# Supplementary material for: Gold nanoparticle-decorated covalent organic frameworks as amplified light-scattering probes for highly sensitive immunodetection of Salmonella in milk
Source: Royal Society of Chemistry journal article supplement (doi:10.1039/d3an00946g), 2023-01-01
Supplement: d3an00946g1.pdf [file d3an00946g1.pdf]

## Supporting information

### Gold nanoparticle-decorated covalent organic frameworks as amplified light-scattering probes for highly sensitive immunodetection of *Salmonella* in milk

Qian Guo <sup>a,b,c, #</sup>, Jun Huang <sup>a,b, #</sup>, Hao Fang <sup>a,b</sup>, Xiaoyang Li <sup>a,b</sup>, Yu Su <sup>a,b</sup>, Yonghua Xiong <sup>a,b,d</sup>,  
Yuankui Leng <sup>a,b,\*</sup> and Xiaolin Huang <sup>a,b,\*</sup>

<sup>a</sup> State Key Laboratory of Food Science and Resources, Nanchang University, Nanchang 330047,  
P. R. China;

<sup>b</sup> School of Food Science and Technology, Nanchang University, Nanchang 330047, P.R. China;

<sup>c</sup> Jiangxi Province Centre for Disease Control and Prevention, Nanchang, 330029, P. R. China

<sup>d</sup> Sino German Joint Research Institute, Nanchang University, Nanchang 330047, P. R. China;

# These two authors contribute equally to this work.

\*Correspondence to:

#### **Dr. Yuankui Leng and Dr. Xiaolin Huang**

State key laboratory of food science and technology, and School of Food Science and  
Technology, Nanchang University

Address: 235 Nanjing East Road, Nanchang 330047, P.R. China

Phone: +0086-791-8833-4578. Fax: +0086-791-8833-3708.

E-mail: [yuankuilengxq@163.com](mailto:yuankuilengxq@163.com); [hx119880503@163.com](mailto:hx119880503@163.com).

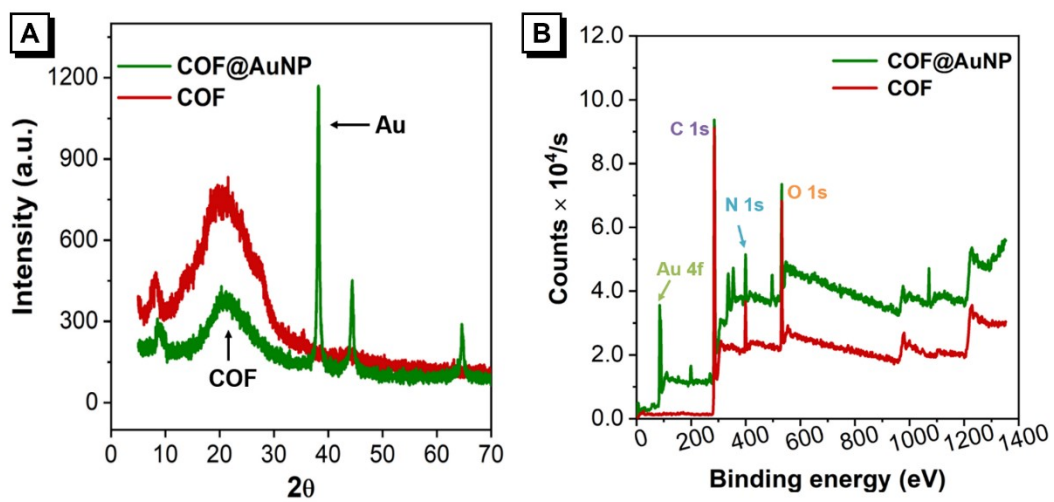

**Figure S1.** (A) Power XRD pattern and (B) XPS spectra of COF and COF@AuNP.

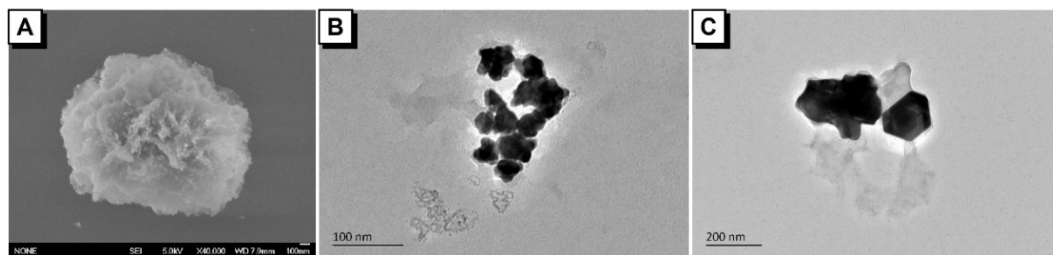

**Figure S2.** (A) SEM image of COF@AuNP; (B-C) Characterization of COF@AuNP based “cargo release-seed growth” process: TEM image of COF@AuNP after 20 min TFA treatment (B) and in-situ seed growth (C).

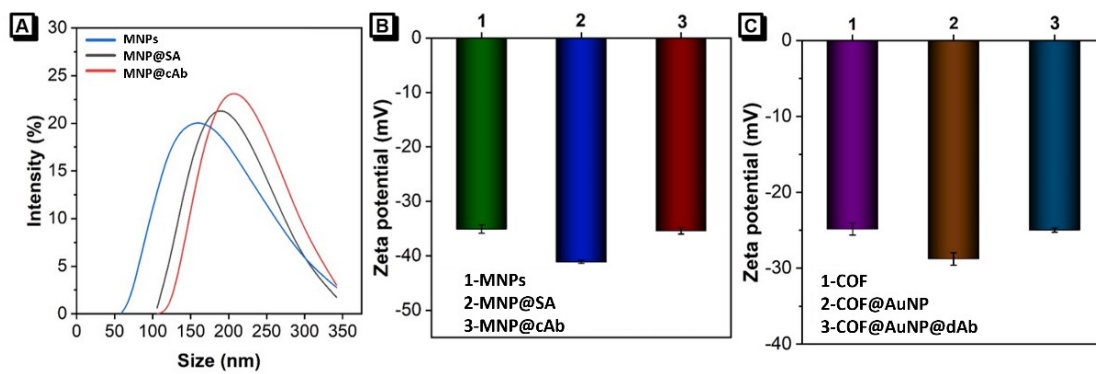

**Figure S3.** Characterization of MNP@cAb carrier and COF@AuNP@dAb probe. (A) Hydrodynamic diameter distribution of MNPs, MNP@SA and MNP@cAb. (B) Zeta potential of MNPs, MNP@SA and MNP@cAb. (C) Zeta potential of COF, COF@AuNP and COF@AuNP@dAb.

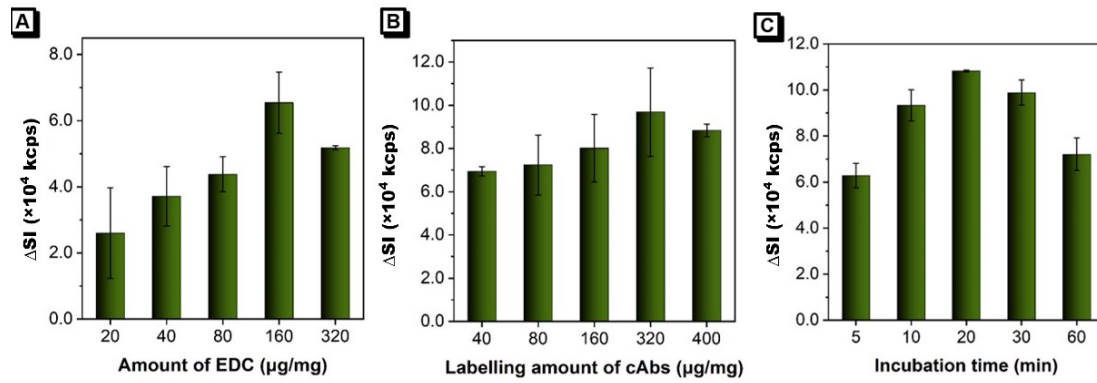

**Figure S4.** Parameter optimization for preparing and applying the MNP@cAb carriers. (A) The dosing amount of EDC. (B) The saturated labelling amounts of biotinylated anti-*Salmonella*-cAb. (C) The incubation time for target capture using MNP@cAb.

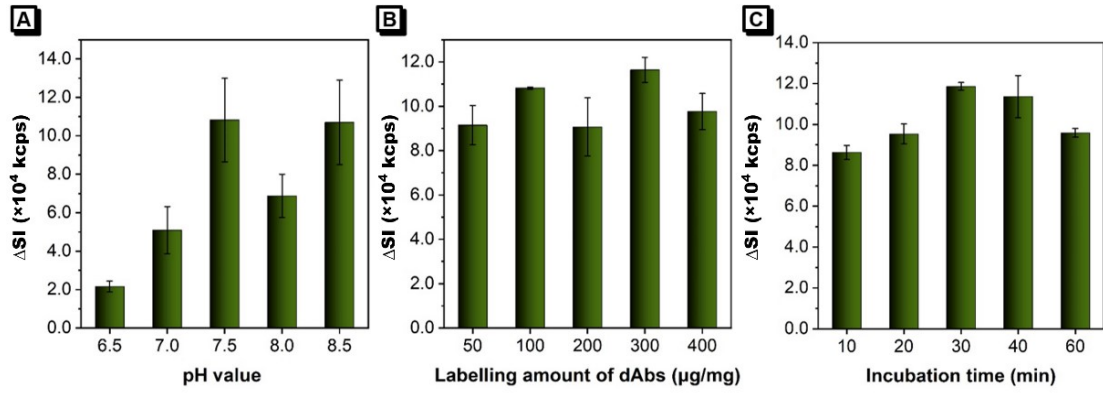

**Figure S5.** Parameter optimization for preparing and applying the COF@AuNP@dAb probes. (A) The pH value for preparation. (B) The saturated labelling amounts of anti-*Salmonella* dAb. (C) The incubation time for COF@AuNP@dAb to bind with the MNP@cAb-*S. typhimurium* immunocomplex.

**Table S1.** Comparison of the proposed DLS immunosensor with other reported *Salmonella* analytical technologies.

| Methods         | Matrix                                  | LOD (CFU/mL)      | Linear range (CFU/mL)                  | Ref              |
|-----------------|-----------------------------------------|-------------------|----------------------------------------|------------------|
| ELISA           | milk                                    | $1.4 \times 10^5$ | $1 \times 10^8$                        | 1                |
| Electrochemical | chicken meats                           | 80                | $10^2 - 10^6$                          | 2                |
| LFIA            | potable water, salad, watermelon juice, | $10^2$            | $10^2 - 10^8$                          | 3                |
|                 | orange juice, milk                      | $9.8 \times 10^4$ | $2.9 \times 10^6 - 2.9 \times 10^{11}$ | 4                |
| Fluorescence    | milk                                    | $4.9 \times 10^3$ | $4.9 \times 10^3 - 4.9 \times 10^7$    | 5                |
| Colorimetric    | milk                                    | 95                | $3.3 \times 10^1 - 3.3 \times 10^6$    | 6                |
| DLS             | milk                                    | 60                | $2.0 \times 10^2 - 2.0 \times 10^5$    | <u>This work</u> |

**Table S2.** Detection of *S. typhimurium* in milk samples with the proposed DLS immunosensor.

| Sample No. | Spiked conc. (CFU/mL) | Detected conc. (CFU/mL) | Recovery (%) | CV (%) |
|------------|-----------------------|-------------------------|--------------|--------|
| 1          | 0                     | ND                      | —            | —      |
| 2          | 0                     | ND                      | —            | —      |
| 3          | 0                     | ND                      | —            | —      |
| 4          | 200                   | 174                     | 87           | 10.4   |
| 5          | 200                   | 186                     | 93           | 8.6    |
| 6          | 200                   | 205                     | 102.5        | 9.6    |
| 7          | $1 \times 10^3$       | $1.12 \times 10^3$      | 112          | 3.9    |
| 8          | $1 \times 10^3$       | $0.89 \times 10^3$      | 89           | 11.5   |
| 9          | $1 \times 10^3$       | $1.05 \times 10^3$      | 105          | 4.2    |
| 10         | $5 \times 10^3$       | $4.67 \times 10^3$      | 93.4         | 7.7    |
| 11         | $5 \times 10^3$       | $5.08 \times 10^3$      | 101          | 4.7    |
| 12         | $5 \times 10^3$       | $4.92 \times 10^3$      | 98.4         | 9.8    |
| 13         | $1 \times 10^4$       | $1.07 \times 10^4$      | 107          | 10.2   |
| 14         | $1 \times 10^4$       | $1.16 \times 10^4$      | 116          | 5.3    |
| 15         | $1 \times 10^4$       | $0.98 \times 10^4$      | 98           | 10.6   |
| 16         | $1 \times 10^5$       | $0.91 \times 10^5$      | 91           | 8.1    |
| 17         | $1 \times 10^5$       | $1.14 \times 10^5$      | 114          | 13.2   |
| 18         | $1 \times 10^5$       | $0.95 \times 10^5$      | 95           | 6.7    |

ND is representative for not detected.



## REFERENCES

1. Y. He, Y. Ren, B. Guo, Y. Yang, Y. Ji, D. Zhang, J. Wang, Y. Wang and H. Wang, *Food Chem.*, 2020, **310**, 125942.
2. L. Wang, X. Huo, W. Qi, Z. Xia, Y. Li and J. Lin, *Talanta*, 2020, **211**, 120715.
3. Z. Wang, X. Yao, R. Wang, Y. Ji, T. Yue, J. Sun, T. Li, J. Wang and D. Zhang, *Biosens. Bioelectron.*, 2019, **132**, 360-367.
4. L. Ji, L. Zhang, H. Yang, S. Liang, J. Pan, Y. Zou, S. Li, Q. Li and S. Zhao, *J. Colloid Interface Sci.*, 2022, **621**, 489-498.
5. S. Ding, H. Hu, X. Yue, K. Feng, X. Gao, Q. Dong, M. Yang, U. Tamer, G. Huang and J. Zhang, *J. Dairy Sci.*, 2022, **105**, 2895-2907.
6. S. Chen, X. Yang, S. Fu, X. Qin, T. Yang, C. Man and Y. Jiang, *Food Control*, 2020, **115**, 107281.
